# Supplementary material for: CsrA Regulates Swarming Motility and Carbohydrate and Amino Acid Metabolism in Vibrio alginolyticus
Source: MDPI journal article supplement (doi:10.3390/microorganisms9112383), 2021-11-18
Supplement: s1 [file s1]

**Table S1.** Primers for construction in this study.

| Purpose                                  | Oligo name                | 5' to 3'                                      |
|------------------------------------------|---------------------------|-----------------------------------------------|
| <i>csrA</i> Arg6His mutants construction | pSW7848_fwd               | GTCTGATTTCGTTACCAATTATGACAAC                  |
|                                          | pSW7848_rev               | GAATTCGATATCAAGCTTATCGATAC                    |
|                                          | <i>csrAR6H</i> -up_fwd    | ATAAGCTTGATATCGAATTCTGCACGCTCGCTTACCGG        |
|                                          | <i>csrAR6H</i> -up_rev    | AAATTAGCATTCTTTGCTCCTTGAGTAATCTCTAAATTTTCTTGC |
|                                          | <i>csrAR6H</i> -down_fwd  | GGAGCAAAGAATGCTAATTTTGACTCACCG                |
|                                          | <i>csrAR6H</i> -down_rev  | TAATTGGTAACGAATCAGACAGGATTCGAACCTCCGAC        |
|                                          | Del-check-pSW7848-F       | TCACTGTCCCTTATTCGCACC                         |
|                                          | Del-check-pSW7848-R       | CTGCTTTTGAGCACTACCCG                          |
|                                          | del-check- <i>csrA</i> -F | CACCCGAATGTGTGGATACAGC                        |
|                                          | del-check- <i>csrA</i> -R | CTGGCTTAACCGTTGCTGATTTAAT                     |
| over expression of CsrA construction     | over- <i>csrA</i> _fwd    | GTCTGATTTCGTTACCAATTATGACAAC                  |
|                                          | over- <i>csrA</i> _rev    | GAATTCGATATCAAGCTTATCGATAC                    |
|                                          | over_pSCT32_fwd           | ATAAGCTTGATATCGAATTCTGCACGCTCGCTTACCGG        |
|                                          | over_pSCT32_rev           | AAATTAGCATTCTTTGCTCCTTGAGTAATCTCTAAATTTTCTTGC |
|                                          | pSCT32-over-check-F       | GGAGCAAAGAATGCTAATTTTGACTCACCG                |
|                                          | pSCT3-over-check-R        | TAATTGGTAACGAATCAGACAGGATTCGAACCTCCGAC        |

Table S2. Primers for qPCR.

| Oligo name | 5' to 3'              |
|------------|-----------------------|
| q-aceE-F   | TTTCCAGTCTTCTGCTGCGT  |
| q-aceE-R   | CATCAGTTTAGGGTGCGGGT  |
| q-acnB-F   | TTCAACGCGTAACCTCCCGA  |
| q-acnB-R   | CGTAGCGTCGATTTGCTTCG  |
| q-alaS-F   | CTTCCACAAGTTGGTTGGCG  |
| q-alaS-R   | TTAAGTCAGCTGGGAAGCCG  |
| q-ald-F    | TGGGTCGTTTGCCACTGTTA  |
| q-ald-R    | AATAGTGACGTCAGCGCGAA  |
| q-avtA-F   | GCGTGCGTATTGATTGTCC   |
| q-avtA-R   | TTCGCGGTAAGCCTTTTCCA  |
| q-eno-F    | AAGACGCAGGTTACACAGCA  |
| q-eno-R    | CACGGTCAGAACGGCTCATA  |
| q-fbp-F    | CGTGATTTACGGCTCCTCCA  |
| q-fbp-R    | CACCCCTTGAGGGAAACGAA  |
| q-flaC2-F  | TTGAACGGCTCATTGCGTGA  |
| q-flaC2-R  | TGGGTCAACGCTCCAGTTTT  |
| q-flgC1-F  | CCCTTGCAAACGAAGAAGGC  |
| q-flgC1-R  | ATTGACCCATCTGCAGCGTA  |
| q-flgC2-F  | CAGAGAAGCGTTTTGAGCCG  |
| q-flgC2-R  | AGCAGACCTTGCTGCATACT  |
| q-fruA-F   | TGAACGGCCTGACTGACTTC  |
| q-fruA-R   | CTTTGTTTACCGGGCCTCCT  |
| q-gcvP-F   | CTTCACGCCGAACGTGATTC  |
| q-gcvP-R   | GCGTTCGCGATTTCCATACC  |
| q-glxA-F   | CGCGCAGGACTTAGTTGGTA  |
| q-glxA-R   | AGCTTTCTTCCCTTGCGACA  |
| q-cs-F     | GCGGATAAGAAAGCGACCCCT |
| q-cs-R     | ACCATTGGCTCCCAGCTTAC  |
| q-lafA-F   | GCACACTAACTACGCTTCGC  |
| q-lafA-R   | TGTTTGCGCTTCTAGACGGT  |
| q-pdhA-F   | CAATGTGCCGCCGATTTCTT  |
| q-pdhA-R   | GATGAGTGTTGCGCCTTTCC  |
| q-pfkA-F   | AATCGGTGGTGATGGTTCGT  |
| q-pfkA-R   | TCACGTAGACGGTCGATTGC  |
| q-proB-F   | ACGAGATGGCGAGTAAGCAG  |
| q-proB-R   | TCGCAACGGCATCATTTTCG  |
| q-proQ-F   | AAACCAGGTGCAGTACGTGT  |
| q-proQ-R   | GGTTTCGCTTTCGCCTTACC  |
| q-proV-F   | ACTTGCCGGCATCGATGTTA  |
| q-proV-R   | CAGGCTAACGCTCTCGCTAA  |
| q-putA-F   | CAGGCTGTAAACCGTCTGGT  |
| q-putA-R   | GTGAAACCTTTGTCGCGCAT  |
| q-sdaA-F   | AACGCGTCTATCTCTGGTGC  |
| q-sdaA-R   | ACCTGAACCTGACCTGCAAC  |
| q-sdaB-F   | GGCAAGTCGTCACCTTCTCCA |
| q-sdaB-R   | CAACTTCTCCCTGACACCCC  |
| q-sdaC-F   | AACCCTGAAGCGGACATCAC  |
| q-sdaC-R   | ACCGAATACTACGCCTGCTG  |
| q-serA-F   | AGAGGGACTCCACCCTTCTT  |

---

|                   |                           |
|-------------------|---------------------------|
| q- <i>serA</i> -R | CGGGAGCGGATACCAATGAA      |
| q- <i>tdh</i> -F  | AATCGGTGACCGCGTATCTG      |
| q- <i>tdh</i> -R  | AAGTGCTGTGTGTACTGCGT      |
| q- <i>thrA</i> -F | CCGCAGGTAACGAGAAAGGT      |
| q- <i>thrA</i> -R | TTCCACTAAACGAGGGTCGC      |
| q- <i>ppc</i> -F  | TGCGCATGTTAGGCCACTTA      |
| q- <i>ppc</i> -R  | GCTGTCCCTGTCTGCTTGAT      |
| q- <i>pckA</i> -F | CGCCCGACAGAAGAAGAGTT      |
| q- <i>pckA</i> -R | GATAAGTTGCATGCGCTCGG      |
| q- <i>sdhA</i> -F | ATGCGTTGGGAAAACAGCAC      |
| q- <i>sdhA</i> -R | AGACTTGTCCGCTAGATGCG      |
| q- <i>sucA</i> -F | AGCATCCTACACCACGCAAA      |
| q- <i>sucA</i> -R | AGTCTACAGAGTGCAACGCC      |
| q- <i>sucC</i> -F | ACCAAAC TGACGCTAACGGT     |
| q- <i>sucC</i> -R | GGCGTTTCTTCCGCAACTTT      |
| q- <i>fbxA</i> -F | CAGTGGGCTACTTGGGATGG      |
| q- <i>fbxA</i> -R | CCATACGCGTGGATCGTAGT      |
| q- <i>gltD</i> -F | GTATGACGCGCTGCCATTTT      |
| q- <i>gltD</i> -R | TTGAGGTACGAACGCAGTCC      |
| q- <i>gltB</i> -F | TTGTTGCCATTCTTGGTGCG      |
| q- <i>gltB</i> -R | CAGCATGACTCGACCCTGTT      |
| q- <i>ppsA</i> -F | TCAGAAGGTGAAACGGGCTACG    |
| q- <i>ppsA</i> -R | TCAAGACGAGCAAGACCAAC      |
| q- <i>pykA</i> -F | CACTACGCTGGGTCCTTCAA      |
| q- <i>pykA</i> -R | TGGTACGGACTTTGTTTCGCA     |
| q-16S-F           | CTGGAAC TGAGACACGGTCC     |
| q-16S-R           | CTCGCACCCCTCCGTATTACC     |
| q- <i>recA</i> -F | TCTTCATCAACCAAATCCGTA     |
| q- <i>recA</i> -R | GCTGCAATCTTATTCTTAACAATT  |
| q- <i>csrA</i> -F | AATTTTGACTCGCCGCGTAGG     |
| q- <i>csrA</i> -R | TGAATGCGCATGTAGATTCTTCACG |

---

**Table S3.** Genes for q-PCR and mRNA stability experiments.

| Gene_ID       | Symbol       | Description                                                                                |
|---------------|--------------|--------------------------------------------------------------------------------------------|
| BAU10_RS22550 | <i>lafA</i>  | lateral flagellin LafA                                                                     |
| BAU10_RS02985 | <i>flgC1</i> | flagellar basal-body rod protein FlgC                                                      |
| BAU10_RS16785 | <i>flgC2</i> | flagellar basal-body rod protein C                                                         |
| BAU10_RS03035 | <i>flaC2</i> | flagellin                                                                                  |
| BAU10_RS04120 | <i>glgA</i>  | glycogen synthase                                                                          |
| BAU10_RS00575 | <i>fbp</i>   | Fructose-1,6-bisphosphatase                                                                |
| BAU10_RS14165 | <i>pfkA</i>  | 6-phosphofructokinase                                                                      |
| BAU10_RS12575 | <i>fbaA</i>  | fructose-bisphosphate aldolase                                                             |
| BAU10_RS12400 | <i>eno</i>   | phosphopyruvate hydratase                                                                  |
| BAU10_RS19230 | <i>fruA</i>  | PTS fructose transporter subunit IIBC                                                      |
| BAU10_RS12545 | <i>serA</i>  | <b>D-3-phosphoglycerate dehydrogenase</b>                                                  |
| BAU10_RS20470 | <i>pdhA</i>  | <b>ABC transporter permease</b>                                                            |
| BAU10_RS12140 | <i>aceE</i>  | <b>pyruvate dehydrogenase (acetyl-transferring),<br/>homodimeric type</b>                  |
| BAU10_RS12035 | <i>acnB</i>  | <b>bifunctional aconitate hydratase 2/2-<br/>methylisocitrate dehydratase</b>              |
| BAU10_RS03265 | <i>CS</i>    | <b>citrate (Si)-synthase</b>                                                               |
| BAU10_RS13680 | <i>ppc</i>   | <b>phosphoenolpyruvate carboxylase</b>                                                     |
| BAU10_RS15770 | <i>pckA</i>  | <b>phosphoenolpyruvate carboxykinase</b>                                                   |
| BAU10_RS03280 | <i>sdhA</i>  | <b>succinate dehydrogenase catalytic subunit</b>                                           |
| BAU10_RS03290 | <i>sucA</i>  | <b>2-oxoglutarate dehydrogenase, E1 component</b>                                          |
| BAU10_RS03300 | <i>sucC</i>  | <b>succinyl-CoA synthetase subunit beta</b>                                                |
| BAU10_RS17220 | <i>ppsA</i>  | <b>phosphoenolpyruvate synthase</b>                                                        |
| BAU10_RS09350 | <i>pykA</i>  | pyruvate kinase II                                                                         |
| BAU10_RS08610 | <i>sdaC</i>  | serine transporter                                                                         |
| BAU10_RS08615 | <i>sdaA</i>  | L-serine dehydratase 1                                                                     |
| BAU10_RS16735 | <i>sdaB</i>  | L-serine ammonia-lyase                                                                     |
| BAU10_RS19180 | <i>gcvP</i>  | glycine dehydrogenase (aminomethyl-<br>transferring)                                       |
| BAU10_RS01440 | <i>thrA</i>  | <b>bifunctional aspartate kinase /homoserine<br/>dehydrogenase I</b>                       |
| BAU10_RS22370 | <i>tdh</i>   | <b>L-threonine 3-dehydrogenase</b>                                                         |
| BAU10_RS06505 | <i>proV</i>  | <b>ABC superfamily (glycine/betaine/ proline<br/>transport protein)</b>                    |
| BAU10_RS07350 | <i>proQ</i>  | RNA chaperone ProQ                                                                         |
| BAU10_RS02410 | <i>proB</i>  | gamma-glutamyl kinase                                                                      |
| BAU10_RS23405 | <i>putA</i>  | <b>bifunctional proline dehydrogenase/L-glutamate<br/>gamma-semialdehyde dehydrogenase</b> |
| BAU10_RS04925 | <i>ald</i>   | <b>alanine dehydrogenase</b>                                                               |
| BAU10_RS12335 | <i>alaS</i>  | alanine--tRNA ligase                                                                       |
| BAU10_RS15215 | <i>avtA</i>  | valine--pyruvate transaminase                                                              |
| BAU10_RS01380 | <i>gltD</i>  | <b>glutamate synthase</b>                                                                  |
| BAU10_RS01385 | <i>gltB</i>  | <b>glutamate synthase</b>                                                                  |

Note: Bold letters (depicted in black) indicate the genes used for mRNA stability experiments.
